# Supplementary material for: The adder (Vipera berus) in Southern Altay Mountains: population characteristics, distribution, morphology and phylogenetic position
Source: PeerJ. 2016 Aug 16;4:e2342. doi: 10.7717/peerj.2342 (PMC4991858; doi:10.7717/peerj.2342)
Supplement: Data S2 — The associated raw data (location, date, time, GPS_ID, longitude, latitude, survey methods, dorsal pattern, sex, age class, altitude, habitat) for all 34 adder sightings in this study. [file peerj-04-2342-s004.xlsx]

## Sheet: Sheet1
Number	Location	Date	Time	GPS_ID	Longitude	Latitude	Line-transect or opportunistic	Melanistic or Zig-zag	Sex	Age_class	Altitude	Habitat	Captured
1	Kanas_Baihu	2014-07-17	17:28:00	40	87.4319	49.0336	B-D3	Zig-zag	Male	Adult	1815.69	Coniferous forest	No
2	Kanas_Baihu	2014-07-19	11:03:44	57	87.4871	49.0396	opportunistic	Zig-zag	Male	Adult	1724.65	Coniferous forest	No
3	Kanas_Baihu	2014-07-20	11:27:37	76	87.4962	49.0447	opportunistic	Zig-zag	Female	Adult	1748.35	Coniferous forest	No
4	Kanas_Baihu	2014-07-22	14:55:39	116	87.5102	49.0551	B-U2	Zig-zag	Male	Adult	1935.26	Coniferous forest	No
5	Kanas_Baihu	2014-08-08	14:44:21	290	87.5061	49.059	B-U2	Zig-zag	Male	Adult	2124.92	Subalpine shrub and meadow	No
6	Kanas_Aketuergun	2014-07-28	15:49:37	200	87.3384	49.0181	A-D1	Zig-zag	Male	Adult	1890.94	Shrubby steppe	No
7	Kanas_Aketuergun	2014-07-28	16:57:38	202	87.3444	49.0154	A-D1	Zig-zag	Female	Adult	1700.13	Shrubby steppe	No
8	Kanas_Baihu	2014-08-04	11:52:45	227	87.4785	49.0352	opportunistic	Zig-zag	Female	Adult	1695.22	Coniferous forest	No
9	Kanas_Baihu	2014-08-04	12:14:36	232	87.4724	49.0334	opportunistic	Zig-zag	Male	Adult	1679.61	Coniferous forest	No
10	Kanas_Baihu	2014-08-04	14:30:13	238	87.4609	49.031	B-D2	Zig-zag	Female	Adult	1707.86	Coniferous forest	No
11	Kanas_Baihu	2014-08-04	16:10:45	243	87.4619	49.0366	B-D2	Zig-zag	Female	Adult	1988.73	Shrubby steppe	No
12	Kanas_Baihu	2014-07-21	13:28:56	97	87.5024	49.0493	B-U1	Zig-zag	Female	Adult	1787.37	Coniferous forest	No
13	Kanas_Aketuergun	2014-08-12	14:18:56	334	87.3135	48.9861	A-D3	Zig-zag	Female	Adult	1551	Mixed forest	No
14	Kanas_Aketuergun	2014-08-30	13:48:24	534	87.2902	48.9556	opportunistic	Zig-zag	Female	Adult	1445.85	Shrubby steppe	No
15	Kanas_Baihu	2014-07-20	14:32:52	89	87.5344	49.0564	B-U3	Zig-zag	Not sure	Adult	1964	Shrubby steppe	No
16	Kanas_Aketuergun	2014-08-24	14:45:14	456	87.3538	49.0113	A-D1	Zig-zag	Female	Adult	1524.34	Coniferous forest	No
17	Kanas_Aketuergun	2014-08-15	13:25:44	403	87.3286	48.9977	opportunistic	Zig-zag	Female	Adult	1491.99	Coniferous forest	No
18	Kanas_Aketuergun	2015-07-10	14:22:50	887	87.3129	48.9809	opportunistic	Melanistic	Male	Adult	1475.72	Shrubby steppe	Yes
19	Kanas_Aketuergun	2015-07-18	18:09:14	979	87.378	49.0131	opportunistic	Zig-zag	Female	Adult	1564.67	Coniferous forest	Yes
20	Kanas_Baihu	2015-07-24	11:22:27	1059	87.4677	49.0307	opportunistic	Zig-zag	Female	Adult	1675.39	Coniferous forest	No
21	Kanas_Baihu	2015-08-01	18:11:06	1214	87.4994	49.0652	B-U2	Zig-zag	Female	juvenile	2266.68	Subalpine shrub and meadow	Yes
22	Kanas_Aketuergun	2015-08-19	15:51:07	1373	87.3366	49.0035	opportunistic	Zig-zag	Female	Adult	1515	Coniferous forest	Yes
23	Kanas_Hutou	2015-07-03	15:01:45	837	87.2565	48.9261	H-U4	Zig-zag	Female	Adult	1432.97	Shrubby steppe	N
24	Kanas_Hutou	2015-09-03	19:52:28	1501	87.214	48.9184	opportunistic	Melanistic	Female	Adult	1407.74	Coniferous forest	Yes
25	Kanas_Hutou	2015-09-06	11:37:36	1510	87.2097	48.9186	opportunistic	Zig-zag	Female	newborn	1408	Shrubby steppe	No
26	Kanas_Hutou	2015-09-07	12:44:24	1511	87.214	48.9185	opportunistic	Zig-zag	Female	Adult	1425.02	Coniferous forest	Yes
27	Kanas_Baihu	2015-08-09	13:05:24	1747	87.508	49.0484	opportunistic	Zig-zag	Male	Adult	1845	Coniferous forest	Yes
28	Kanas_Baihu	2015-08-08	15:14:39	1287	87.514	49.0584	opportunistic	Zig-zag	Male	Adult	1979	Shrubby steppe	No
29	Kanas_Aketuergun	2015-08-27	16:06:56	1989	87.3255	48.9972	opportunistic	Melanistic	Male	Adult	1504	Coniferous forest	Yes
30	Kanas_Hutou	2015-09-03	18:18:23	1045	87.2374	48.9159	opportunistic	Melanistic	Female	Adult	1400	Shrubby steppe	Yes
31	Kanas_Aketuergun	2015-08-27	14:19:33	1451	87.3354	49.0028	opportunistic	Melanistic	Not sure	Adult	1495	Shrubby steppe	No
32	Dadonggou	2014-06-22	18:00:29	391	88.1013	47.9907	Da-1	Zig-zag	Male	Adult	1248.13	Shrubby steppe	Yes
33	Dadonggou	2014-07-07	13:45:17	420	88.0932	47.9697	opportunistic	Zig-zag	Not sure	Adult	1164.91	Shrubby steppe	No
34	Dadonggou	2014-07-03	15:17:29	396	88.0994	47.9543	Da-2	Zig-zag	Female	Adult	1121	Shrubby steppe	No
